# Supplementary material for: Synthesis and characterization of submicron single-crystalline Bi2Fe4O9 cubes
Source: Royal Society of Chemistry journal article supplement (doi:10.1039/b501552a), 2005-01-01
Supplement: b501552a.pdf [file b501552a.pdf]

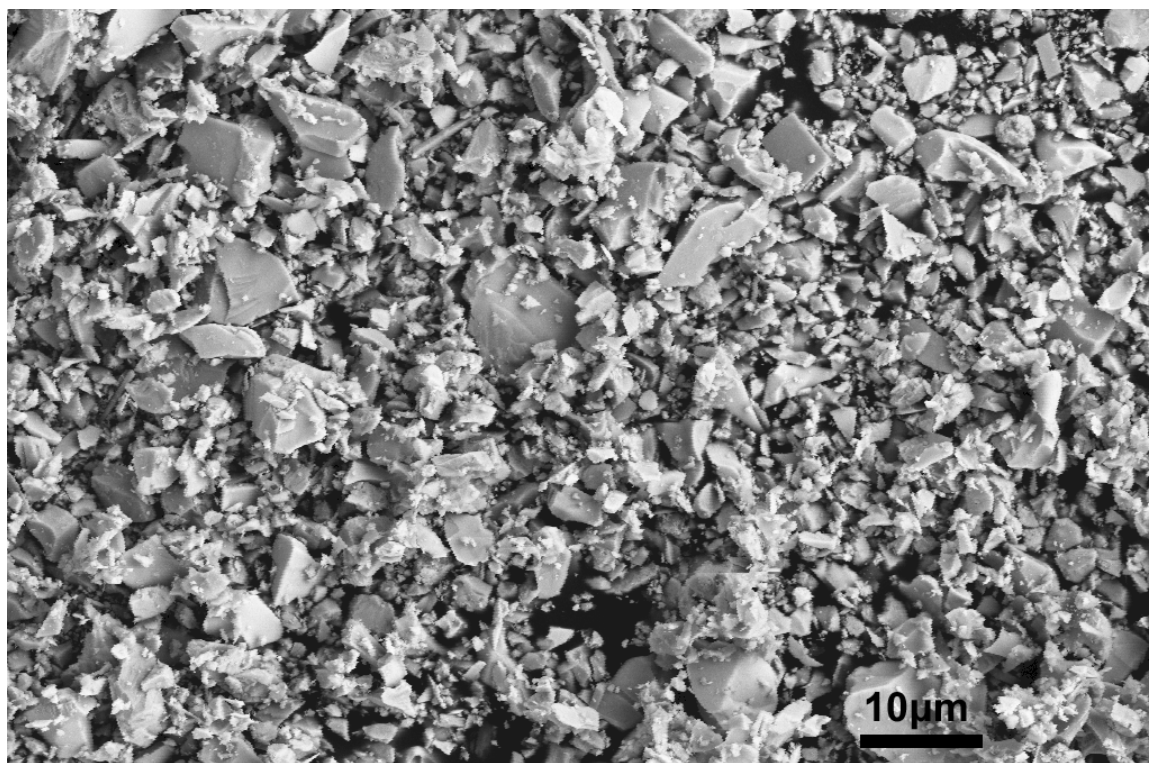

**Figure S1.** SEM image of Bi<sub>2</sub>Fe<sub>4</sub>O<sub>9</sub> materials prepared using the method described herein but in the absence of NaCl.
